# Supplementary material for: Early Effects of Mycorrhizal Fungal Inoculum and Fertilizer on Morphological and Physiological Variables of Nursery-Grown Nothofagus alessandrii Plants
Source: MDPI journal article supplement (doi:10.3390/plants12071521), 2023-03-31
Supplement: s1 [file s1]

## Supplementary Materials

**Table S1.** Significance level for the main effects (TP = Plant type, F = Fertilization, M = mycorrhization) and their interactions in the morphological attributes height and diameter of *Nothofagus alessandrii*.

| Factor | Significance level (** $p < 0.001$ , ** $p < 0.01$ , * $p < 0.05$ ) |          |
|--------|---------------------------------------------------------------------|----------|
|        | Height                                                              | Diameter |
| TP     | ***                                                                 | ***      |
| F      | n.s.                                                                | n.s.     |
| TP*F   | n.s.                                                                | n.s.     |
| M      | n.s.                                                                | ***      |
| TP*M   | n.s.                                                                | ***      |
| F*M    | n.s.                                                                | n.s.     |
| TP*F*M | n.s.                                                                | n.s.     |

**Table S2.** Significance level for the main effects (TP = Plant type, F = Fertilization, M = mycorrhization) and their interactions in the morphological attributes Stem:Root Index (SRI) and Slenderness Index (SI) of *Nothofagus alessandrii* seedlings.

| Factor | Significance level (** $p < 0.001$ , ** $p < 0.01$ , * $p < 0.05$ , $p < 0.1$ ) |      |
|--------|---------------------------------------------------------------------------------|------|
|        | SRI                                                                             | SI   |
| TP     | ***                                                                             | ***  |
| F      | ***                                                                             | n.s. |
| TP*F   | n.s.                                                                            | *    |
| M      | n.s.                                                                            | n.s. |
| TP*M   | n.s.                                                                            | *    |
| F*M    | .                                                                               | **   |
| TP*F*M | *                                                                               | n.s. |

**Table S3.** Macro and micro nutrients concentration in leaves of *Nothofagus alessandrii* in one and two-season plants (P1 and P2) (TP = Plant type, F = Fertilization, M = mycorrhization)

| TP | F  | M  | N Dumas (%) | N Kjeldahl (%) | P (%) | K (%) | Ca (%) | Mg (%) | Mn (ppm) | Zn (ppm) | Cu (ppm) | Fe (ppm) | B (ppm) |
|----|----|----|-------------|----------------|-------|-------|--------|--------|----------|----------|----------|----------|---------|
| P1 | F1 | M0 | 2.34        | 2.17           | 0.46  | 0.69  | 0.39   | 0.55   | 946      | 61       | 6        | 606      | 89      |
| P1 | F1 | M2 | 2.43        | 2.26           | 0.42  | 0.7   | 0.32   | 0.45   | 772      | 61       | 6        | 257      | 83      |
| P1 | F1 | M1 | 2.44        | 2.26           | 0.46  | 0.63  | 0.34   | 0.46   | 569      | 55       | 10       | 245      | 83      |
| P1 | F1 | M1 | 2.22        | 2.06           | 0.39  | 0.58  | 0.36   | 0.5    | 738      | 60       | 5        | 258      | 90      |
| P1 | F2 | M0 | 2.72        | 2.52           | 0.69  | 0.74  | 0.36   | 0.45   | 1186     | 132      | 15       | 280      | 198     |
| P1 | F2 | M0 | 2.61        | 2.42           | 0.68  | 0.74  | 0.35   | 0.47   | 1291     | 128      | 10       | 266      | 228     |
| P1 | F1 | M0 | 2.44        | 2.26           | 0.39  | 0.61  | 0.38   | 0.5    | 977      | 63       | 4        | 242      | 82      |
| P1 | F2 | M1 | 2.79        | 2.59           | 0.78  | 0.79  | 0.3    | 0.44   | 1387     | 110      | 10       | 188      | 197     |
| P1 | F2 | M2 | 2.76        | 2.56           | 0.73  | 0.87  | 0.32   | 0.41   | 1444     | 100      | 11       | 160      | 187     |
| P1 | F2 | M1 | 2.81        | 2.6            | 0.75  | 0.82  | 0.33   | 0.43   | 1950     | 117      | 12       | 235      | 196     |
| P1 | F1 | M0 | 2.48        | 2.3            | 0.56  | 0.62  | 0.35   | 0.45   | 799      | 57       | 7        | 177      | 88      |
| P1 | F2 | M2 | 2.8         | 2.59           | 0.75  | 0.91  | 0.38   | 0.46   | 1792     | 111      | 21       | 201      | 190     |
| P1 | F2 | M0 | 2.67        | 2.48           | 0.72  | 0.73  | 0.37   | 0.46   | 1687     | 103      | 13       | 197      | 187     |
| P1 | F1 | M1 | 2.36        | 2.19           | 0.54  | 0.76  | 0.4    | 0.46   | 1015     | 64       | 7        | 241      | 101     |
| P1 | F2 | M2 | 2.58        | 2.39           | 0.69  | 0.8   | 0.35   | 0.44   | 1408     | 105      | 12       | 210      | 209     |
| P1 | F2 | M1 | 2.64        | 2.44           | 0.67  | 0.84  | 0.33   | 0.49   | 829      | 103      | 10       | 216      | 223     |
| P1 | F1 | M2 | 2.47        | 2.29           | 0.56  | 0.71  | 0.37   | 0.45   | 1055     | 76       | 10       | 232      | 86      |
| P1 | F1 | M2 | 2.12        | 1.96           | 0.5   | 0.65  | 0.37   | 0.53   | 1057     | 64       | 8        | 349      | 91      |
| P2 | F2 | M2 | 2.48        | 2.3            | 0.79  | 1.03  | 0.42   | 0.45   | 1071     | 97       | 12       | 203      | 203     |
| P2 | F1 | M2 | 1.9         | 1.76           | 0.46  | 0.56  | 0.39   | 0.45   | 621      | 45       | 5        | 216      | 94      |
| P2 | F1 | M2 | 1.97        | 1.83           | 0.51  | 0.61  | 0.4    | 0.44   | 830      | 55       | 6        | 217      | 98      |
| P2 | F1 | M1 | 1.95        | 1.8            | 0.46  | 0.67  | 0.45   | 0.43   | 841      | 51       | 5        | 227      | 103     |
| P2 | F1 | M0 | 2.05        | 1.9            | 0.6   | 0.65  | 0.51   | 0.51   | 1007     | 59       | 12       | 211      | 108     |
| P2 | F1 | M1 | 1.86        | 1.73           | 0.45  | 0.73  | 0.38   | 0.44   | 613      | 50       | 6        | 175      | 106     |
| P2 | F1 | M2 | 1.87        | 1.73           | 0.5   | 0.59  | 0.4    | 0.46   | 1005     | 47       | 7        | 182      | 109     |
| P2 | F1 | M0 | 2.19        | 2.03           | 0.52  | 0.78  | 0.46   | 0.46   | 631      | 56       | 8        | 189      | 115     |
| P2 | F2 | M0 | 2.6         | 2.41           | 0.82  | 1.06  | 0.4    | 0.47   | 1088     | 88       | 12       | 201      | 235     |
| P2 | F2 | M1 | 2.35        | 2.18           | 0.8   | 0.91  | 0.35   | 0.43   | 813      | 88       | 13       | 145      | 221     |
| P2 | F1 | M1 | 1.86        | 1.73           | 0.51  | 0.75  | 0.43   | 0.48   | 784      | 57       | 7        | 276      | 109     |
| P2 | F2 | M0 | 2.59        | 2.4            | 0.61  | 0.8   | 0.39   | 0.41   | 655      | 92       | 11       | 182      | 167     |
| P2 | F2 | M2 | 2.35        | 2.18           | 0.75  | 0.9   | 0.45   | 0.46   | 1002     | 90       | 12       | 287      | 199     |
| P2 | F2 | M0 | 2.48        | 2.3            | 0.98  | 1.22  | 0.51   | 0.54   | 1081     | 105      | 9        | 214      | 258     |
| P2 | F2 | M1 | 2.36        | 2.19           | 0.74  | 0.92  | 0.45   | 0.45   | 1024     | 81       | 11       | 304      | 228     |
| P2 | F2 | M2 | 2.28        | 2.12           | 0.73  | 1.05  | 0.43   | 0.47   | 760      | 84       | 9        | 263      | 243     |
| P2 | F2 | M1 | 2.27        | 2.11           | 0.82  | 1.03  | 0.39   | 0.5    | 824      | 95       | 9        | 355      | 265     |

**Table S4.** The significance level for the main effects (TP = Plant type, F = Fertilization, M = mycorrhization) and their interactions on the concentration of nutrients in the leaves of *Nothofagus alessandrii* in one- and two-season plants (P1 and P2).

| Factor | Significance level (** $p < 0.001$ , ** $p < 0.01$ , * $p < 0.05$ , $p < 0.1$ ) |            |      |      |      |      |      |      |      |      |      |
|--------|---------------------------------------------------------------------------------|------------|------|------|------|------|------|------|------|------|------|
|        | N Dumas                                                                         | N Kjeldahl | P    | K    | Ca   | Mg   | Mn   | Zn   | Cu   | Fe   | B    |
| F      | ***                                                                             | ***        | ***  | ***  | n.s. | n.s. | ***  | ***  | ***  | n.s. | ***  |
| M      | *                                                                               | *          | n.s. | n.s. | .    | .    | n.s. | n.s. | n.s. | n.s. | n.s. |
| TP     | ***                                                                             | ***        | .    | **   | ***  | n.s. | **   | ***  | n.s. | n.s. | **   |
| FxM    | n.s.                                                                            | n.s.       | n.s. | n.s. | n.s. | n.s. | n.s. | n.s. | n.s. | n.s. | n.s. |
| FxTP   | n.s.                                                                            | n.s.       | n.s. | **   | n.s. | n.s. | *    | *    | n.s. | .    | n.s. |
| MxTP   | *                                                                               | *          | n.s. | .    | n.s. |
| FXMXTP | n.s.                                                                            | n.s.       | n.s. | n.s. | n.s. | n.s. | n.s. | n.s. | n.s. | n.s. | n.s. |

**Table S5.** Level of significance for main effects (TP = Plant type, F = Fertilization, M = mycorrhization) and their interactions on photosynthesis, stomatal conductance, and intracellular CO<sub>2</sub> of *Nothofagus alessandrii* plants.

| Factor | Significance level (** $p < 0.001$ , ** $p < 0.01$ , * $p < 0.05$ ) |                      |                      |
|--------|---------------------------------------------------------------------|----------------------|----------------------|
|        | Photosynthesis                                                      | Stomatal conductance | Intracellular carbon |
| TP     | n.s.                                                                | ***                  | ***                  |
| F      | **                                                                  | n.s.                 | **                   |
| TP*F   | n.s.                                                                | *                    | n.s.                 |
| M      | n.s.                                                                | *                    | n.s.                 |
| TP*M   | **                                                                  | n.s.                 | ***                  |
| F*M    | n.s.                                                                | n.s.                 | n.s.                 |
| TP*F*M | n.s.                                                                | n.s.                 | n.s.                 |
